# Supplementary material for: Giant comprehensive capacitive energy storage in lead-free quasi-linear relaxor ferroelectrics via local heterogeneous polarization configuration
Source: Royal Society of Chemistry journal article supplement (doi:10.1039/d3ta03294a), 2023-01-01
Supplement: d3ta03294a1.pdf [file d3ta03294a1.pdf]

## Supporting Information:

### **Giant Comprehensive Capacitive Energy Storage in Lead-free Quasi-Linear Relaxor Ferroelectrics via Local Heterogeneous Polarization Configuration**

Jikang Liu<sup>a</sup>, Chongyang Li<sup>a</sup>, Wangfeng Bai<sup>a,b\*</sup>, Yongjun Yuan<sup>a\*</sup>, Peng Zheng<sup>a</sup>, Qiaolan Fan<sup>a</sup>, Shiting Wu<sup>a</sup>, Jingji Zhang<sup>c</sup>, Jiwei Zhai<sup>d\*</sup>

<sup>a</sup>College of Materials and Environmental Engineering, Hangzhou Dianzi University,  
No. 2 Street, Hangzhou, China

<sup>b</sup>Key Laboratory of Novel Materials for Sensor of Zhejiang Province, Hangzhou  
Dianzi University, Hangzhou 310012, China

<sup>c</sup>College of Materials Science and Engineering, China Jiliang University, Hangzhou,  
310018, China

<sup>d</sup>Functional Materials Research Laboratory, School of Materials Science &  
Engineering, Tongji University, No. 4800 Caoan Highway, Shanghai, China.

\* Corresponding author. E-mail address: bwfcxj@126.com (W.Bai),  
yjyuan@hdu.edu.cn (Y.Yuan), apzhai@tongji.edu.cn (J.Zhai).

## Experimental section

**Material preparation:** The  $(1-x) \text{CaTiO}_3-x \text{NaNbO}_3$  (CT-xNN,  $x = 0.2, 0.3, 0.4, 0.5$ ) lead-free ceramics were manufactured by the traditional solid reaction method. High-purity oxides and carbonate ( $\geq 99\%$ ) of  $\text{Na}_2\text{CO}_3$ ,  $\text{Nb}_2\text{O}_5$ ,  $\text{TiO}_2$ , and  $\text{CaCO}_3$  powders were selected as the raw materials. The NN powders were calcined at  $800\text{ }^\circ\text{C}$  for 4 h and the CT powders were calcined at  $1000\text{ }^\circ\text{C}$  for 3 h in air. Subsequently, based on the stoichiometric ratio, the resulting powders were weighted and milled for 12 h. Afterward, these powders were mixed with 8 wt% organic binders (PVA) and then pressed into discs. The obtained ceramics disks were sintered at  $1150\text{-}1350\text{ }^\circ\text{C}$  for 4-6 h in a sacrificial powder of the same composition and sealed crucibles. To perform ESP measurements, the ceramics were ground and polished to approximately  $60\text{-}80\text{ }\mu\text{m}$  in thickness and then sputtered with gold electrodes. For dielectric and charging-discharging measurements, the silver paste was coated on two parallel ceramic surfaces, and finally fired at  $600\text{ }^\circ\text{C}$  for 30 min as electrodes.

**Characterization :** X-ray diffraction with Cu  $K\alpha$  radiation (XRD; MiniFlex600, Rigaku, Japan) and Raman spectroscopy (Horiba/Jobin Yvon, Villeneuve d'Ascq, France) with 532 nm excitation were adopted to analyze the phase structures. The grain morphology and mapping were measured by field-emission scanning electron microscopy (FE-SEM, S-4200, Hitachi, Tokyo, Japan). The piezoelectric force microscopy (PFM, Bruker Dimension Icon) with conductive Platinum-Iridium silicon cantilevers (SCM-PIT, Bruker) was employed to observe the domain structure and analyze the dynamics. Field-emission transmission electron microscope (TEM, FEI Talos F200X, USA) operated at 200 kV was adopted to observe the domain morphology and high-resolution atomic image of the ceramic. For TEM measurements, the ceramics were subjected to ion milling (Gatan 695, USA).

Dielectric properties with respect to temperature and frequency were tested by an LCR meter (Agilent 4990 A, Palo Alto, CA) at a heating rate of  $3\text{ }^\circ\text{C}/\text{min}$ . The band gap ( $E_g$ ) of the particle samples was determined by a UV-vis spectrophotometer (TU-1901, Puxi Instruments Technology, China) with an integrating sphere. The

polarization hysteresis ( $P$ - $E$ ) loops with respect to temperature, frequency, cycles and the FORC loops were measured via an FE test system (RT1-Premier II, Radiant Technologies InC, USA). The energy release behavior of ceramic capacitors was evaluated via a commercial charge-discharge platform (CFD-003, Gogo Instruments Technology, China) with a certain discharge resistance, inductance, and capacitance load circuit. The Vickers hardness of the ceramics were obtained under a load of 4.9033 N for 15 s using a Vickers diamond indenter (FALCON 507, INNOVATEST, the Netherlands).

**The FORC distribution :** In this work,  $E_{\max}$  is set to be 100 kV/cm,  $\Delta\alpha = \Delta\beta = \Delta E = 4$  kV/cm. An approximate method to calculate  $p(\alpha, \beta)$  is

$$p(\alpha, \beta) = \frac{1}{2} \frac{\partial^2 P^2(\alpha, \beta)}{\partial \alpha \partial \beta} \quad \#(1)$$

where  $p(\alpha, \beta)$  is the polarization of the FORC loop,  $\alpha$  is the reversal electric field,  $\beta$  is the real electric field<sup>1, 2</sup>.

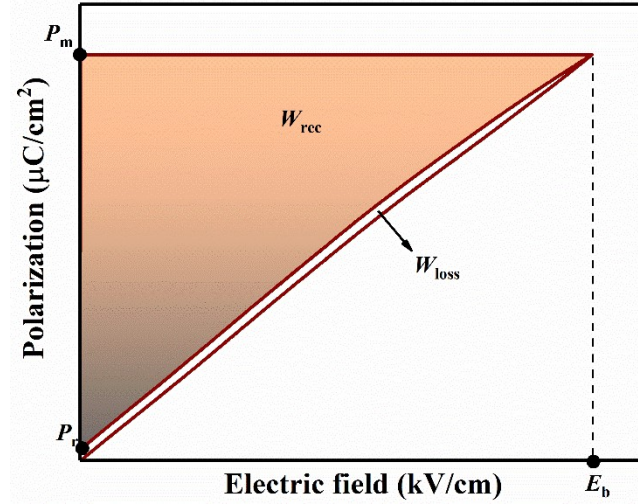

**Figure S1.** Schematic diagram of  $P$ - $E$  loop for the definition of energy storage performance.

The energy storage performance ( $W_{rec}$ , total energy density  $W$ , and  $\eta$ ) of dielectric capacitors can be calculated by the following formula:

$$W_{rec} = \int_{P_r}^{P_{max}} E dP \#(2)$$

$$W = \int_0^{P_{max}} E dP \#(3)$$

$$\eta = \frac{W_{rec}}{W} \times 100\% \#(4)$$

where  $P_r$ ,  $P_m$ , and  $E$  denote the remnant polarization, maximum polarization and electric field, respectively<sup>3</sup>. Clearly, in order to realize high  $W_{rec}$  and  $\eta$ , large  $\Delta P$  ( $P_{max} - P_r$ ) and high  $E_b$  are required at the same time.

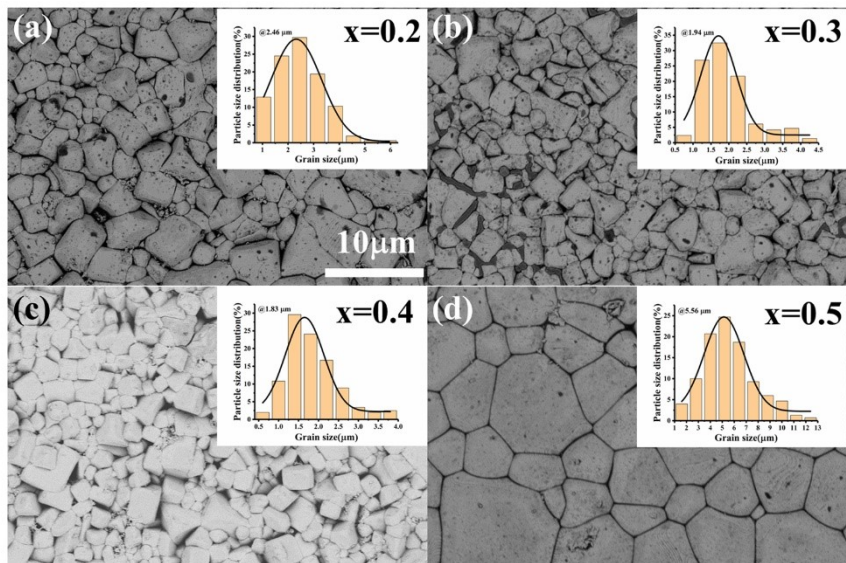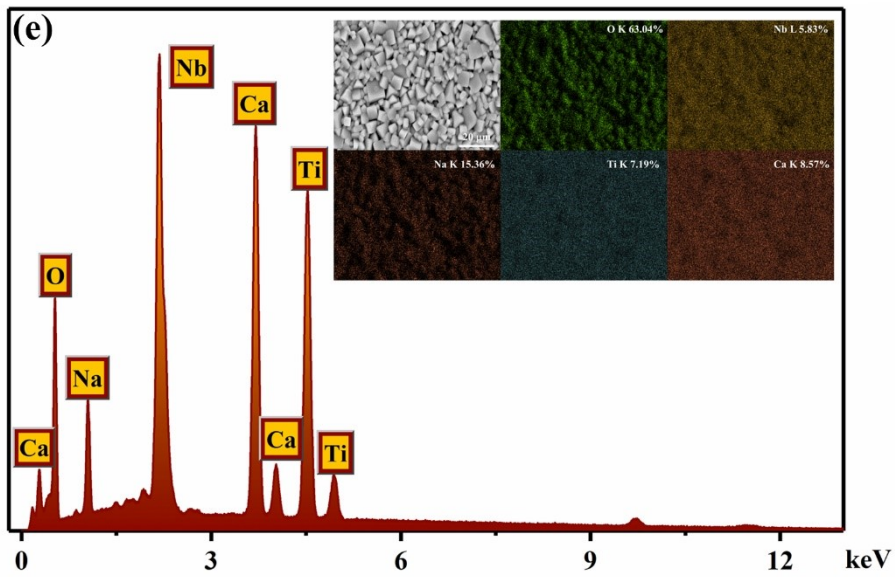

**Figure S2.** (a-d) SEM images and grain size distributions for CT-xNN ceramics. (e) Energy spectrum and atomic proportion for x=0.4 ceramic.

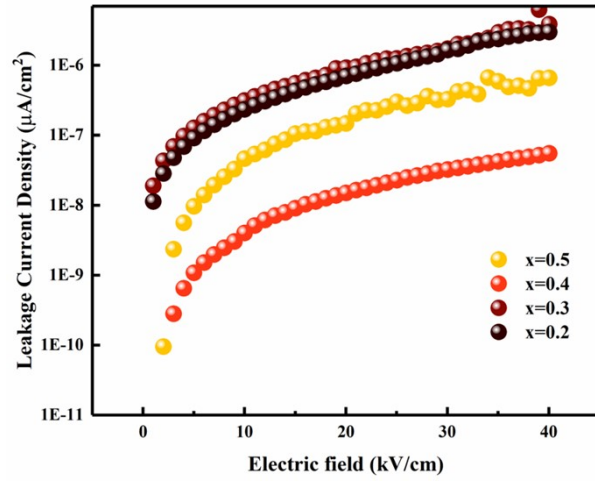

**Figure S3.** Leakage current density for CT-xNN ceramics.

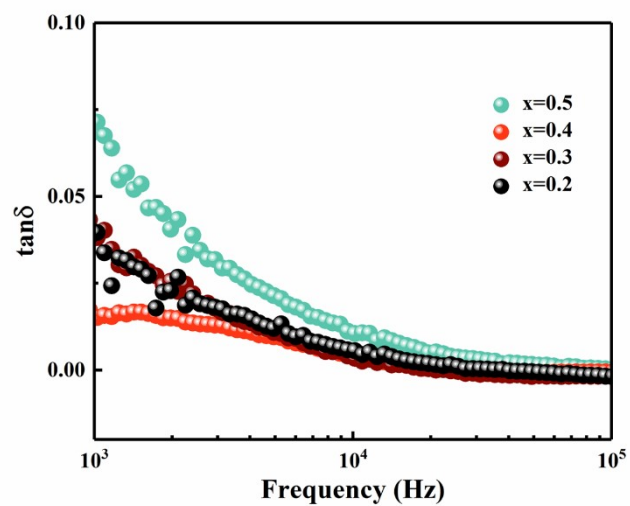

**Figure S4.** Frequency-dependent dielectric loss for CT-xNN ceramics measured at room temperature.

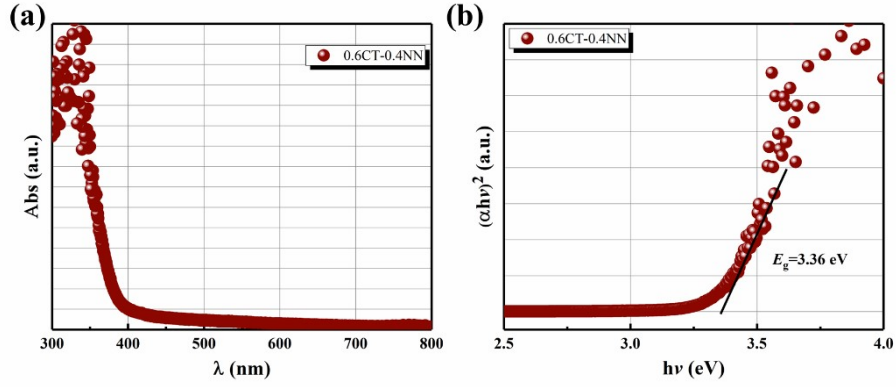

**Figure S5.** (a) UV-vis absorption spectrum and (b) the dependence of  $(\alpha hv)^2$  on  $hv$  for CT-0.4NN ceramic.

The band gap ( $E_g$ ) can be obtained by the Tauc equation:

$$(\alpha hv)^2 = A(hv - E_g)^n \quad (5)$$

where  $hv$ ,  $A$  and  $\alpha$  represent photon energy, a constant and absorption coefficient, respectively<sup>4</sup>. The wide  $E_g$  will hinder the jump of electrons from the top of the valence band to the bottom of the conduction band, which accounts for a high intrinsic  $E_b$ <sup>5,6</sup>.



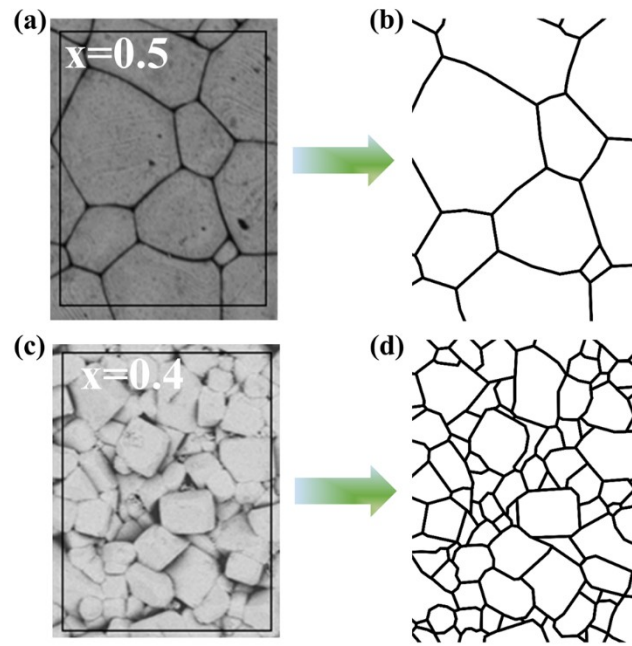

**Figure S6.** 2D model of  $x=0.5$  (a and b) and 0.4 (c and d) ceramics for finite element simulation calculation.

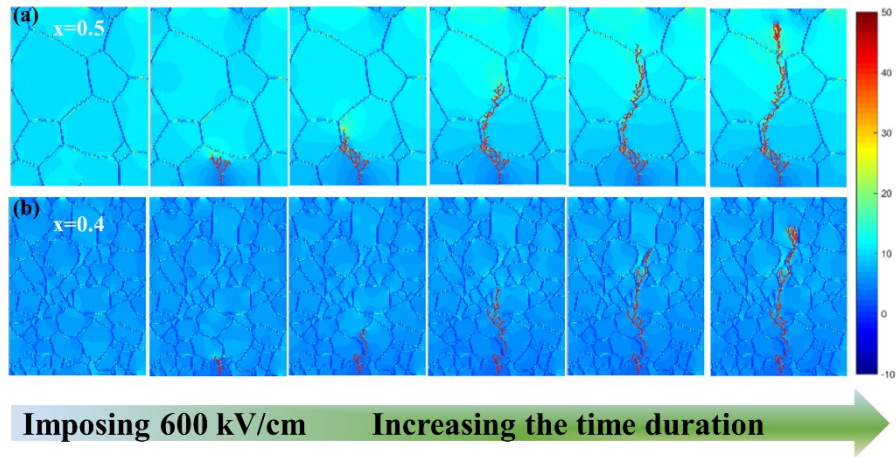

**Figure S7.** The simulated real-time evolutions of polarization distributions coupled with electrical tree propagation for (a)  $x=0.5$  and (b)  $x=0.4$  ceramics at 600 kV/cm.

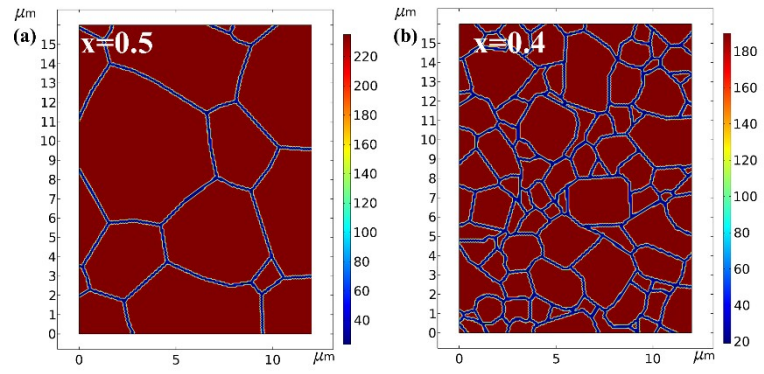

**Figure S8.** The strong dielectric constant difference between grain and grain boundary for the indicated ceramics.

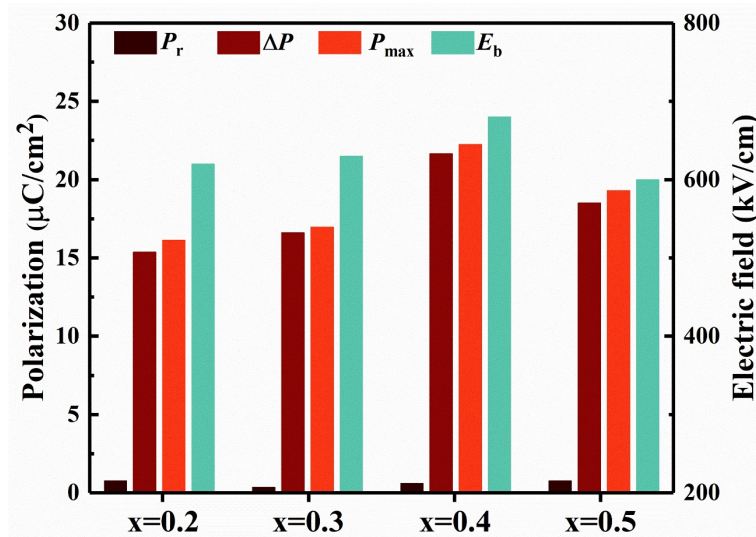

Figure S9. The changes of  $P_r$ ,  $\Delta P$ ,  $P_m$  and  $E_b$  for CT-xNN ceramics.

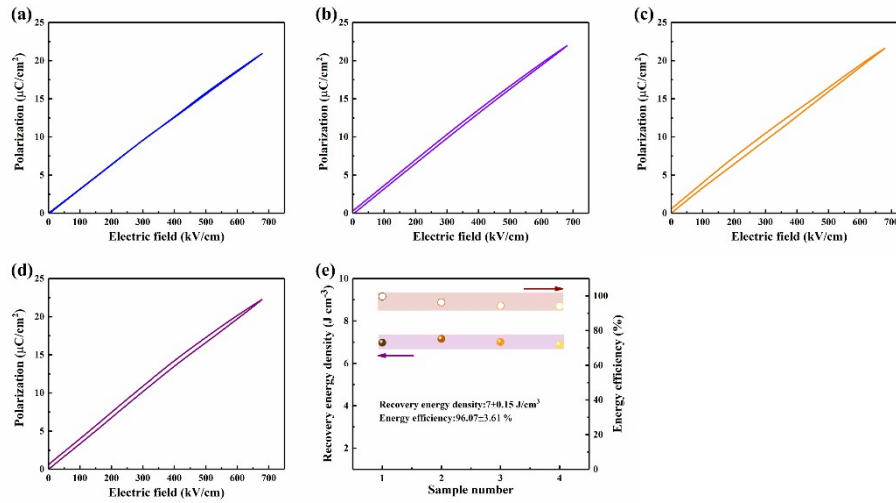

**Figure S10.** (a)-(d) The  $P$ - $E$  curves of four samples for CT-0.4NN ceramic and (e) the uniformity of  $W_{\text{rec}}$  and  $\eta$  for CT-0.4NN ceramic.

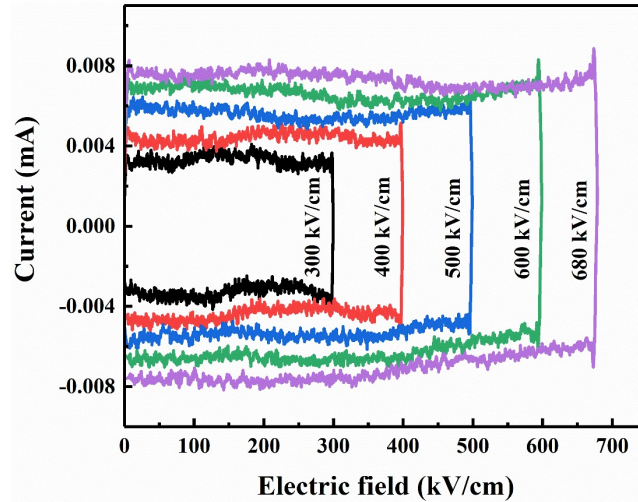

**Figure S11.**  $I$ - $E$  curves with respect to the electric field for the CT-0.4NN ceramic.

The  $I$ - $E$  curves remain flat in shape with no discernible current peak over the whole electric field scope, further indicating the transformation from linear phase to significantly dominated quasi-linear relaxor ferroelectric phase <sup>7</sup>, in line with the observation of unipolar  $P$ - $E$  loops (Fig.3 (a)). This is ascribed to the reinforced reversibility of weakly coupled polar phase induced by the NN addition <sup>6,8</sup>.

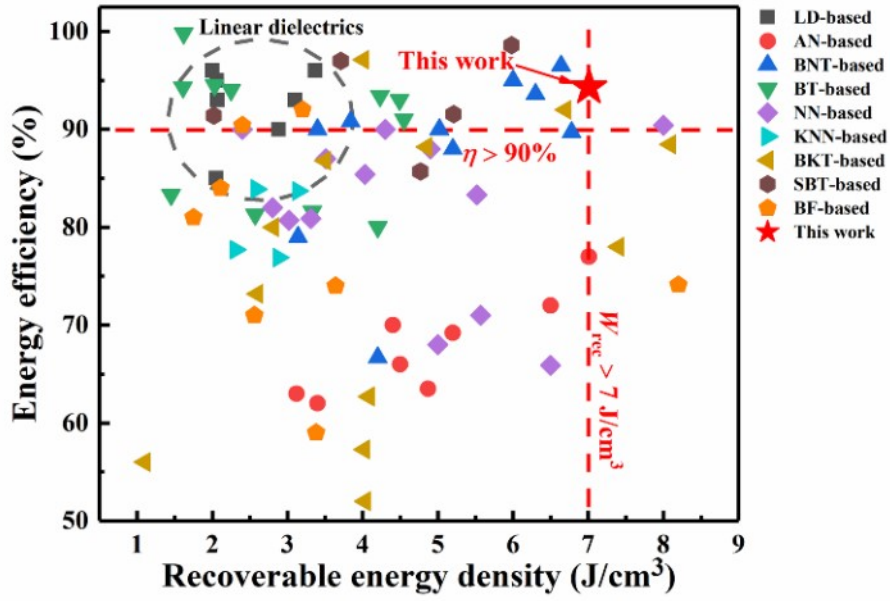

**Figure S12.** Comparison of the  $W_{\text{rec}}$  and  $\eta$  of CT-0.4NN ceramic with LD-based, AN-based, BNT-based, BT-based, NN-based, KNN-based, BKT-based, SBT-based and BF-based dielectric ceramics.

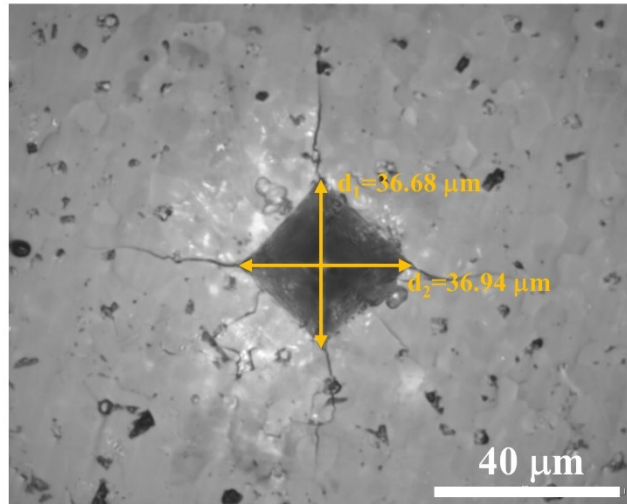

**Figure S13.** The Vickers diamond indenter's pattern for CT-0.5NN ceramic.

The Vickers hardness  $H_v$  can be determined by:

$$H_v = 1.8544 \frac{F}{d^2} \#(6)$$

where  $d$  is the average value of two diagonal lines ( $d_1$  and  $d_2$ ),  $F$  is the applied force of  $4.9033 \text{ N}^9$ . Table S3 provides a summary of the  $H_v$  values for CT-0.5NN ceramic.



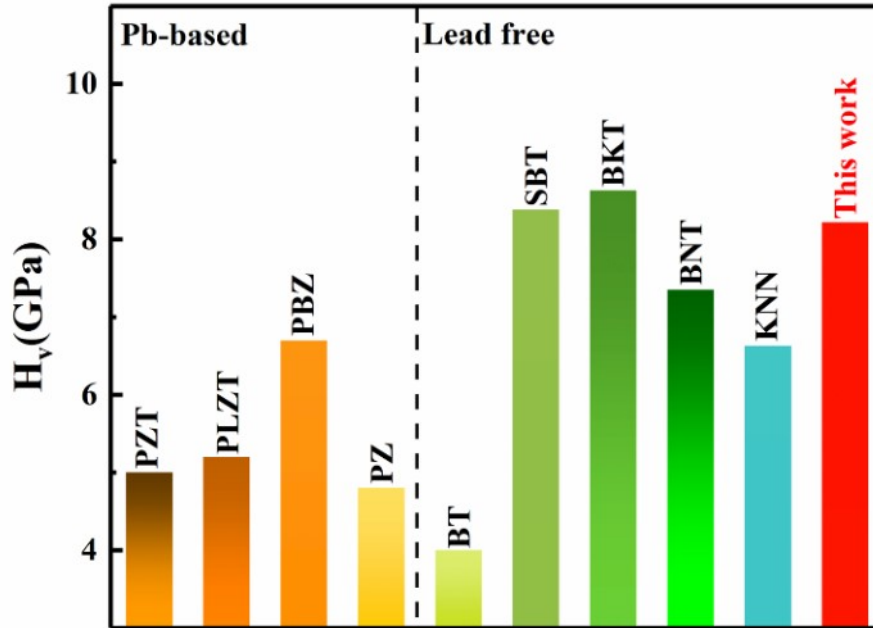

**Figure S14.** A comparison of  $H_v$  and  $W_{rec}$  between the CT-0.4NN ceramic and other systems.

In general, fine grain size, compact microstructure, and grain boundary strengthening contribute to the high hardness<sup>10</sup>. In this study, as given in Fig. S2, fine grains ( $\sim 1.83 \mu\text{m}$ ) with compact microstructure accounts for high strength, bringing about a mass of grain boundaries and thus hampering the movement of dislocations<sup>11</sup>.

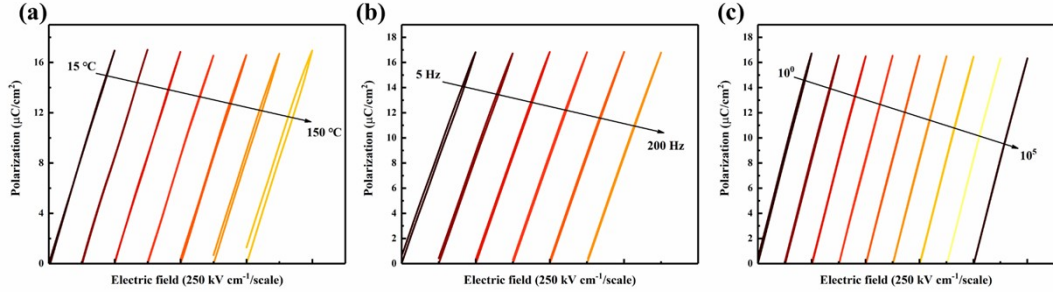

**Figure S15.** Unipolar  $P$ - $E$  loops as functions of (a) temperature, (b) frequency and (c) cycling for CT-0.4NN ceramic at fixed electric field of 500 kV/cm.

With increasing the temperature, the  $W_{\text{rec}}$  and  $\eta$  decrease to a certain degree (Fig. 4(b)). As demonstrated in Fig. 6 (a), the dielectric constant decreases and the dielectric loss increases with the increase of temperature, which lead to the decreased  $P_m$  and increased hysteresis. As a consequence, the  $W_{\text{rec}}$  and  $\eta$  decrease with increasing the temperature.

Indeed, frequency ( $W_{\text{rec}} \sim 4.02 \pm 0.06 \text{ J/cm}^3$ ,  $95.8 \pm 2.06 \%$ )-insensitive ESP can also be gained. On the one hand, as shown in Fig. 6 (b), stable dielectric constant and a slight decline in dielectric loss can be observed with increasing measuring frequency, which can generate stable  $P_m$  and slightly decreased hysteresis with varying frequency, in accordance with the  $P$ - $E$  loops evolutions with frequency (Fig. S15 (b)). Consequently, the slightly increased  $W_{\text{rec}}$  and  $\eta$  with the increment of frequency is available, as presented in Fig. 4 (d). On the other hand, the weak correlation between PNRs and high dynamic of them can also ensure ultrafast response of each PNR to applied field, leading to a slim  $P$ - $E$  loop with a negligible  $P_r$ , thus generating satisfactory frequency endurance <sup>8, 12</sup>.

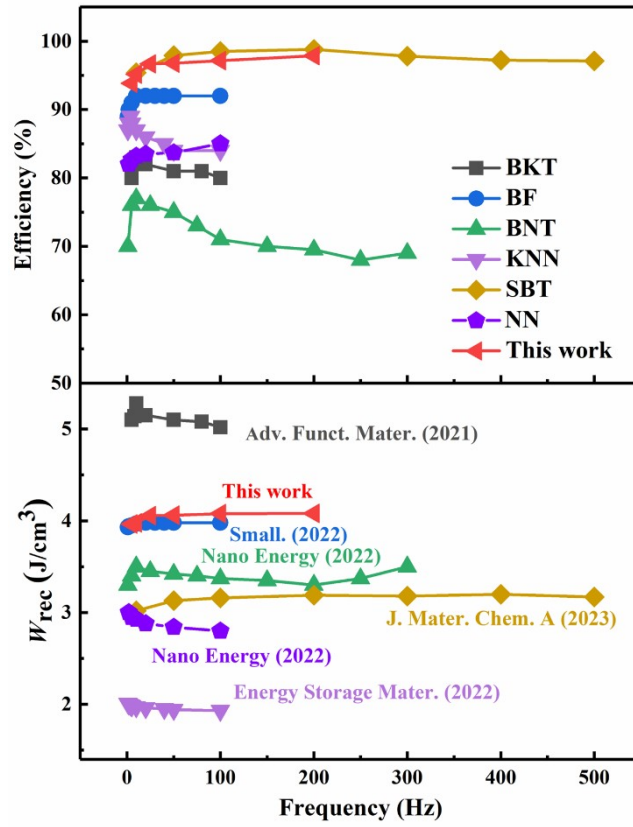

**Figure S16.** A comparison of  $W_{rec}$  and  $\eta$  between the designed ceramic and other recently reported lead-free ceramics with frequency.

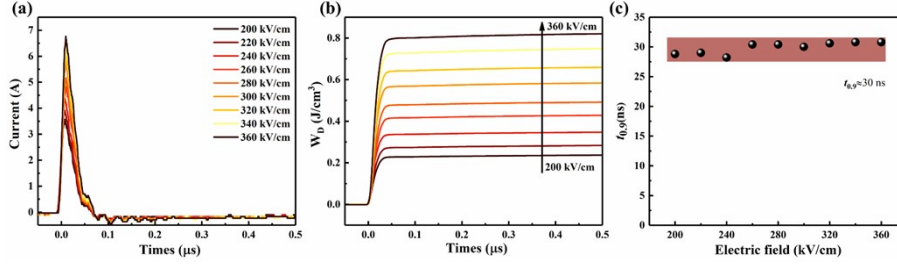

**Figure S17.** (a) Overdamped discharge waveforms with electric field for CT-0.4NN ceramic. (b) Calculated  $W_D$ , and (c)  $t_{0.9}$  values under different electric fields for CT-0.4NN ceramic ( $R = 200 \Omega$ ).

The current density ( $C_D$ ) and power density ( $P_D$ ) can be calculated from the following formulas<sup>13</sup>:

$$C_D = \frac{I_{max}}{S} \#(7)$$

$$P_D = \frac{EI_{max}}{2S} \#(8)$$

where  $I_{max}$ ,  $S$ , and  $E$  are the maximum current, electrode area, and imposed electric field, respectively. The discharged energy density ( $W_d$ ) can be evaluated from the following relationship<sup>13</sup>:

$$W_D = \frac{R \int I^2(t) dt}{V} \#(9)$$

where  $R$  and  $V$  denote the load resistor and sample volume, respectively. The  $W_d$  of  $0.83 \text{ J/cm}^3$  and ultrashort  $t_{0.9} \approx 30 \text{ ns}$  can be obtained at  $360 \text{ kV/cm}$  for CT-0.4NN ceramic.

The  $W_{rec}$  measured by the  $P$ - $E$  experiment is higher than  $W_d$  measured in the RC circuit at the same electric field, as shown in Fig. 3(e) and Fig. S17 (b). Different mechanisms of the quasistatic  $P$ - $E$  loop ( $10^{-1} \text{ s}$ ) and dynamic discharge measurement with different frequencies ( $10^{-5} \text{ s}$ ) are the main contribution for the observed difference between  $W_d$  and  $W_{rec}$ <sup>14</sup>. In addition, the loss of discharged energy is also linked with the equivalent series resistor, domain walls movement and measurement frequency<sup>15</sup>.

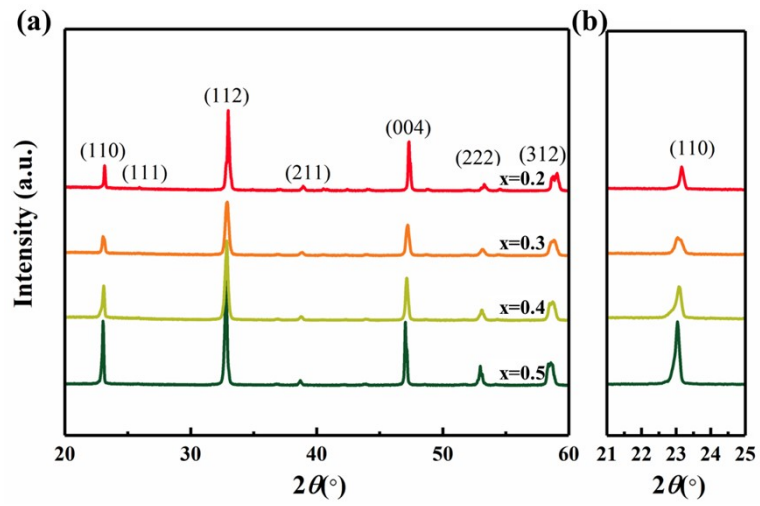

**Figure S18.** (a) XRD patterns and (b) enlarged  $2\theta$  between  $21^{\circ}$  and  $25^{\circ}$  of CT-xNN ceramics.

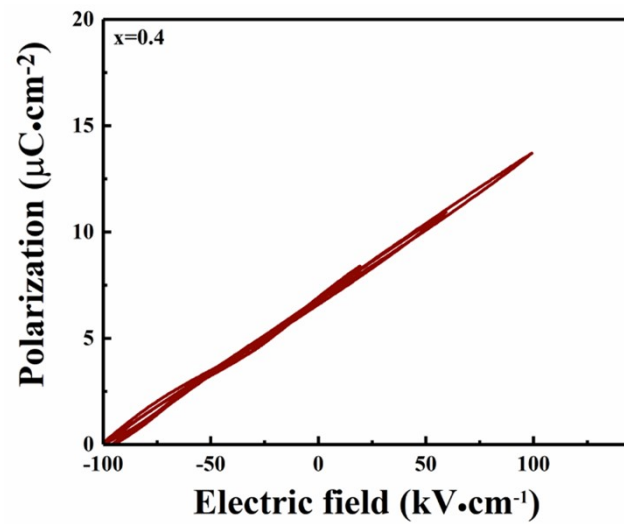

**Figure S19.** Only 4 out of the 50 total FORC loops for CT-0.4NN ceramic.

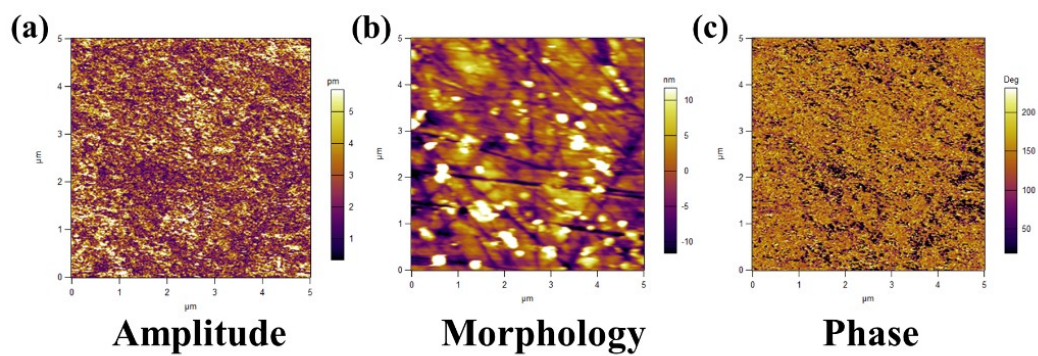

**Figure S20.** (a)-(c) Out-of-plane PFM amplitude, morphology and phase images for CT-0.4NN ceramic at room temperature.

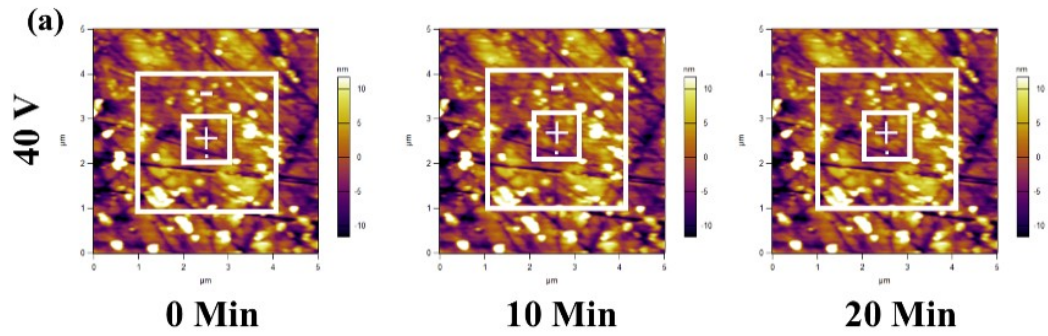

**Figure S21.** Out-of-plane PFM morphology images for CT-0.4NN ceramic under different relaxor time and 40 V at room temperature.

A negative DC voltage with different amplitude was initially imposed to pole a  $3 \times 3 \mu\text{m}^2$  area (larger solid wire frame) and then the same positive voltage was applied to the small internal  $1 \times 1 \mu\text{m}^2$  area (smaller solid wire frame) to explore the reversibility of polarization switching, as shown in Fig. 5 (e) and Fig. S21.



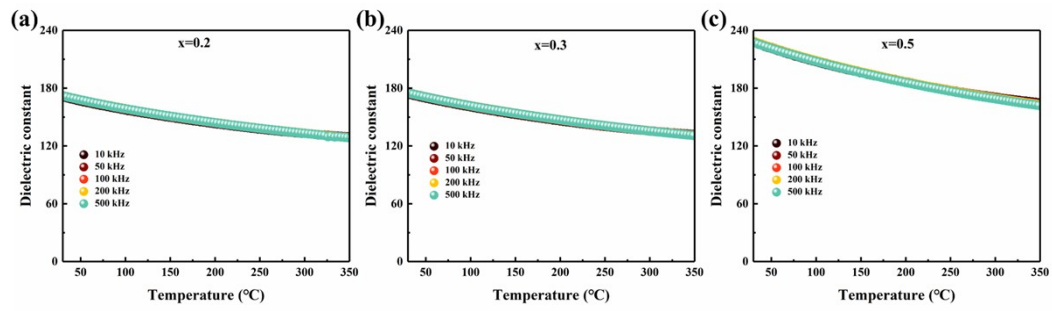

**Figure S22.** Temperature dependence of dielectric constant from 10 kHz to 500 kHz for (a)  $x=0.2$ , (b)  $x=0.3$ , and (c)  $x=0.5$  ceramics.

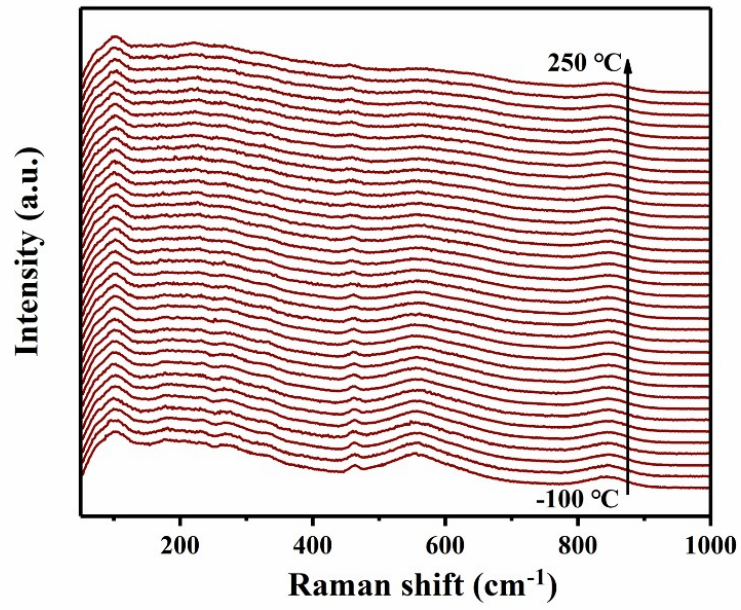

**Figure S23.** Evolutions of Raman spectra with temperatures for CT-0.4NN ceramic.

**Table S1** The comparison of ESP between CT-0.4NN ceramic and previous reports on lead-free energy storage ceramics.

| <b>Figure</b> | <b>Ceramics</b> | <b>Ref.</b>          |
|---------------|-----------------|----------------------|
| Fig.3(g)      | BT-based        | 16-22                |
| Fig.3(g)      | LDs             | 23-28                |
| Fig.3(g)      | SBT-based       | 29-32                |
| Fig.3(g)      | BF-based        | 12, 33, 34           |
| Fig.3(g)      | NN-based        | 35-37                |
| Fig.3(g)      | BNT-based       | 38-42                |
| Fig.3(g)      | KNN-based       | 43, 44               |
| Fig.3(g)      | AN-based        | 6                    |
| Fig.S11       | LDs             | 23-25, 27, 28, 45    |
| Fig.S11       | AN-based        | 46-52                |
| Fig.S11       | BNT-based       | 38, 40-42, 53-56     |
| Fig.S11       | BT-based        | 16, 17, 19-22, 57-59 |
| Fig.S11       | NN-based        | 35, 37, 60-69        |
| Fig.S11       | KNN-based       | 2, 43, 44, 70-77     |
| Fig.S11       | BKT-based       | 11, 78, 79           |
| Fig.S11       | SBT-based       | 29-32                |
| Fig.S11       | BF-based        | 12, 33, 34, 80-84    |

**Table S2** The Vickers hardness values for CT-0.4NN ceramic.

| <b>Number</b>  | <b>Load/(N)</b> | <b><math>d_1/(\mu\text{m})</math></b> | <b><math>d_2/(\mu\text{m})</math></b> | <b><math>d_{\text{ave}}/(\mu\text{m})</math></b> | <b><math>H_v/(\text{GPa})</math></b> |
|----------------|-----------------|---------------------------------------|---------------------------------------|--------------------------------------------------|--------------------------------------|
| 1              | 4.9             | 33.46                                 | 33.18                                 | 33.32                                            | 8.18                                 |
| 2              | 4.9             | 33.73                                 | 32.77                                 | 33.25                                            | 8.22                                 |
| 3              | 4.9             | 33.28                                 | 32.77                                 | 33.03                                            | 8.33                                 |
| 4              | 4.9             | 33.28                                 | 33.45                                 | 33.37                                            | 8.16                                 |
| <b>Average</b> |                 |                                       |                                       |                                                  | <b>8.22</b>                          |

**Table S3** The Vickers hardness values for CT-0.5NN ceramic.

| <b>Number</b>  | <b>Load/(N)</b> | <b><math>d_1/(\mu\text{m})</math></b> | <b><math>d_2/(\mu\text{m})</math></b> | <b><math>d_{\text{ave}}/(\mu\text{m})</math></b> | <b><math>H_v/(\text{GPa})</math></b> |
|----------------|-----------------|---------------------------------------|---------------------------------------|--------------------------------------------------|--------------------------------------|
| 1              | 4.9             | 36.43                                 | 37.43                                 | 36.93                                            | 6.66                                 |
| 2              | 4.9             | 36.53                                 | 36.31                                 | 36.42                                            | 6.85                                 |
| 3              | 4.9             | 36.68                                 | 36.94                                 | 36.81                                            | 6.71                                 |
| <b>Average</b> |                 |                                       |                                       |                                                  | <b>6.74</b>                          |

**Table S4** The comparison of the comprehensive performance between CT-0.4NN ceramic and previous reports on lead-free energy storage ceramics.

| <b>Figure</b> | <b>Ref.</b>               |
|---------------|---------------------------|
| Fig.4(a)      | 11, 29, 31, 85, 86        |
| Fig.4(e)      | 6, 11, 31, 41, 44, 87, 88 |
| Fig.4(h)      | 6, 11, 44, 88             |
| Fig.S13       | 11, 29, 85, 86            |
| Fig.S15       | 2, 11, 29, 89-91          |

## References

1. H. Pan, J. Ma, J. Ma, Q. Zhang, X. Liu, B. Guan, L. Gu, X. Zhang, Y.-J. Zhang, L. Li, Y. Shen, Y.-H. Lin and C.-W. Nan, *Nat. Commun.*, 2018, **9**, 1813.
2. M. Zhang, H. Yang, Y. Lin, Q. Yuan and H. Du, *Energy Stor. Mater.*, 2022, **45**, 861-868.
3. J. Qian, Y. Han, C. Yang, P. Lv, X. Zhang, C. Feng, X. Lin, S. Huang, X. Cheng and Z. Cheng, *Nano Energy*, 2020, **74**, 104862.
4. C. Pascual-Gonzalez, G. Schileo, S. Murakami, A. Khesro, D. Wang, I. M. Reaney and A. Feteira, *Appl. Phys. Lett.*, 2017, **110**, 172902.
5. C. Kim, G. Pilania and R. Ramprasad, *J. Phys. Chem. C*, 2016, **120**, 14575-14580.
6. N. Luo, K. Han, M. J. Cabral, X. Liao, S. Zhang, C. Liao, G. Zhang, X. Chen, Q. Feng, J.-F. Li and Y. Wei, *Nat. Commun.*, 2020, **11**, 4824.
7. B. Yang, Y. Zhang, H. Pan, W. Si, Q. Zhang, Z. Shen, Y. Yu, S. Lan, F. Meng, Y. Liu, H. Huang, J. He, L. Gu, S. Zhang, L.-Q. Chen, J. Zhu, C.-W. Nan and Y.-H. Lin, *Nat. Mater.*, 2022, **21**, 1074-1080.
8. D. Li, D. Zhou, D. Wang, W. Zhao, Y. Guo, Z. Shi, T. Zhou, S.-K. Sun, C. Singh, S. Trukhanov and A. S. B. Sombra, *Small*, 2023, **19**, 2206958.
9. J. Gong, J. Wu and Z. Guan, *J. Eur. Ceram. Soc.*, 1999, **19**, 2625-2631.
10. K. Lu, L. Lu and S. Suresh, *Science*, 2009, **324**, 349-352.
11. L. Chen, F. Long, H. Qi, H. Liu, S. Deng and J. Chen, *Adv. Funct. Mater.*, 2022, **32**, 2110478.
12. H. Qi, A. Xie, A. Tian and R. Zuo, *Adv. Energy Mater.*, 2020, **10**, 1903338.
13. L. Chen, S. Deng, H. Liu, J. Wu, H. Qi and J. Chen, *Nat. Commun.*, 2022, **13**, 3089.
14. J. Li, F. Li, Z. Xu and S. Zhang, *Adv. Mater.*, 2018, **30**, 1802155.
15. J. Li, Z. Shen, X. Chen, S. Yang, W. Zhou, M. Wang, L. Wang, Q. Kou, Y. Liu, Q. Li, Z. Xu, Y. Chang, S. Zhang and F. Li, *Nat. Mater.*, 2020, **19**, 999-1005.
16. X. Dong, X. Li, X. Chen, J. Wu and H. Zhou, *Chem. Eng. J.*, 2021, **409**, 128231.
17. H. Yang, Z. Lu, L. Li, W. Bao, H. Ji, J. Li, A. Feteira, F. Xu, Y. Zhang, H. Sun,

- Z. Huang, W. Lou, K. Song, S. Sun, G. Wang, D. Wang and I. M. Reaney, *ACS Appl. Mater. Interfaces*, 2020, **12**, 43942-43949.
18. L. Wu, X. Wang and L. Li, *RSC Adv.*, 2016, **6**, 14273-14282.
  19. C. Zhu, Z. Cai, L. Li and X. Wang, *J. Alloys Compd.*, 2020, **816**, 152498.
  20. F. Si, B. Tang, Z. Fang, H. Li and S. Zhang, *J. Alloys Compd.*, 2020, **819**, 153004.
  21. L. Zhang, L.-X. Pang, W.-B. Li and D. Zhou, *J. Eur. Ceram. Soc.*, 2020, **40**, 3343-3347.
  22. Q. Hu, Y. Tian, Q. Zhu, J. Bian, L. Jin, H. Du, D. O. Alikin, V. Y. Shur, Y. Feng, Z. Xu and X. Wei, *Nano Energy*, 2020, **67**, 104264.
  23. W. Wang, Y. Pu, X. Guo, T. Ouyang, Y. Shi, M. Yang, J. Li, R. Shi and G. Liu, *Ceram. Int.*, 2019, **45**, 14684-14690.
  24. W. Wang, Y. Pu, X. Guo, R. Shi, M. Yang and J. Li, *Ceram. Int.*, 2020, **46**, 11484-11491.
  25. T. Ouyang, Y. Pu, J. Ji, S. Zhou and R. Li, *Ceram. Int.*, 2021, **47**, 20447-20455.
  26. W. Wang, Y. Pu, X. Guo, R. Shi, M. Yang and J. Li, *J. Alloys Compd.*, 2020, **817**, 152695.
  27. W. Wang, Y. Pu, X. Guo, R. Shi, Y. Shi, M. Yang, J. Li, X. Peng and Y. Li, *J. Eur. Ceram. Soc.*, 2019, **39**, 5236-5242.
  28. L. Zhang, Y. Pu, M. Chen, T. Wei and X. Peng, *Chem. Eng. J.*, 2020, **383**, 123154.
  29. J. Liu, Y. Ding, C. Li, W. Bai, P. Zheng, S. Wu, J. Zhang, Z. Pan and J. Zhai, *J. Mater. Chem. A*, 2023, **11**, 609-620.
  30. Y. Ding, P. Li, J. He, W. Que, W. Bai, P. Zheng, J. Zhang and J. Zhai, *Compos. B. Eng.*, 2022, **230**, 109493.
  31. C. Zuo, S. Yang, Z. Cao, H. Yu and X. Wei, *Chem. Eng. J.*, 2022, **442**, 136330.
  32. P. Zhao, B. Tang, Z. Fang, F. Si, C. Yang, G. Liu and S. Zhang, *J. Materiomics*, 2021, **7**, 195-207.
  33. Z. Chen, X. Bu, B. Ruan, J. Du, P. Zheng, L. Li, F. Wen, W. Bai, W. Wu, L. Zheng and Y. Zhang, *J. Eur. Ceram. Soc.*, 2020, **40**, 5450-5457.
  34. Q. Li, S. Ji, D. Wang, J. Zhu, L. Li, W. Wang, M. Zeng, Z. Hou, X. Gao, X. Lu,



- Q. Li and J.-M. Liu, *J. Eur. Ceram. Soc.*, 2021, **41**, 387-393.
35. D. Lai, Z. Yao, W. You, B. Gao, Q. Guo, P. Lu, A. Ullah, H. Hao, M. Cao and H. Liu, *Ceram. Int.*, 2020, **46**, 13511-13516.
36. L. Yang, X. Kong, Z. Cheng and S. Zhang, *J. Mater. Res.*, 2021, **36**, 1214-1222.
37. H. Chen, J. Shi, X. Chen, C. Sun, F. Pang, X. Dong, H. Zhang and H. Zhou, *J. Mater. Chem. A*, 2021, **9**, 4789-4799.
38. F. Yan, X. He, H. Bai, B. Shen and J. Zhai, *J. Mater. Chem. A*, 2021, **9**, 15827-15835.
39. F. Yan, H. Bai, Y. Shi, G. Ge, X. Zhou, J. Lin, B. Shen and J. Zhai, *Chem. Eng. J.*, 2021, **425**, 130669.
40. D. Li, D. Zhou, W. Liu, P.-J. Wang, Y. Guo, X.-G. Yao and H.-X. Lin, *Chem. Eng. J.*, 2021, **419**, 129601.
41. F. Yan, X. Zhou, X. He, H. Bai, S. Wu, B. Shen and J. Zhai, *Nano Energy*, 2020, **75**, 105012.
42. F. Yang, S. Bao, Y. Zhai, Y. Zhang, Z. Su, J. Liu, J. Zhai and Z. Pan, *Mater. Today Chem.*, 2021, **22**, 100583.
43. Y. Huan, T. Wei, X. Wang, X. Liu, P. Zhao and X. Wang, *Chem. Eng. J.*, 2021, **425**, 129506.
44. D. Li, D. Zhou, D. Wang, W. Zhao, Y. Guo and Z. Shi, *Adv. Funct. Mater.*, 2022, **32**, 2111776.
45. Y. Pu, W. Wang, X. Guo, R. Shi, M. Yang and J. Li, *J. Mater. Chem. C*, 2019, **7**, 14384-14393.
46. J. Gao, Y. Zhang, L. Zhao, K.-Y. Lee, Q. Liu, A. Studer, M. Hinterstein, S. Zhang and J.-F. Li, *J. Mater. Chem. A*, 2019, **7**, 2225-2232.
47. K. Han, N. Luo, S. Mao, F. Zhuo, L. Liu, B. Peng, X. Chen, C. Hu, H. Zhou and Y. Wei, *J. Mater. Chem. A*, 2019, **7**, 26293-26301.
48. N. Luo, K. Han, L. Liu, B. Peng, X. Wang, C. Hu, H. Zhou, Q. Feng, X. Chen and Y. Wei, *J. Am. Ceram. Soc.*, 2019, **102**, 4640-4647.
49. N. Luo, K. Han, F. Zhuo, C. Xu, G. Zhang, L. Liu, X. Chen, C. Hu, H. Zhou and

- Y. Wei, *J. Mater. Chem. A*, 2019, **7**, 15450-15450.
50. Y. Xu, Y. Guo, Q. Liu, G. Wang, J. Bai, J. Tian, L. Lin and Y. Tian, *J. Eur. Ceram. Soc.*, 2020, **40**, 56-62.
51. S. Li, T. Hu, H. Nie, Z. Fu, C. Xu, F. Xu, G. Wang and X. Dong, *Energy Stor. Mater.*, 2021, **34**, 417-426.
52. Z. Lu, W. Bao, G. Wang, S.-K. Sun, L. Li, J. Li, H. Yang, H. Ji, A. Feteira, D. Li, F. Xu, A. K. Kleppe, D. Wang, S.-Y. Liu and I. M. Reaney, *Nano Energy*, 2021, **79**, 105423.
53. J. Huang, H. Qi, Y. Gao, A. Xie, Y. Zhang, Y. Li, S. Wang and R. Zuo, *Chem. Eng. J.*, 2020, **398**, 125639.
54. F. Yan, H. Bai, X. Zhou, G. Ge, G. Li, B. Shen and J. Zhai, *J. Mater. Chem. A*, 2020, **8**, 11656-11664.
55. C. Zhu, Z. Cai, B. Luo, L. Guo, L. Li and X. Wang, *J. Mater. Chem. A*, 2020, **8**, 683-692.
56. C. Luo, Q. Feng, N. Luo, C. Yuan, C. Zhou, Y. Wei, T. Fujita, J. Xu and G. Chen, *Chem. Eng. J.*, 2021, **420**, 129861.
57. W.-B. Li, D. Zhou, L.-X. Pang, R. Xu and H.-H. Guo, *J. Mater. Chem. A*, 2017, **5**, 19607-19612.
58. L. Chen, H. Wang, P. Zhao, C. Zhu, Z. Cai, Z. Cen, L. Li and X. Wang, *J. Am. Ceram. Soc.*, 2019, **102**, 4178-4187.
59. D. Meng, Q. Feng, N. Luo, C. Yuan, C. Zhou, Y. Wei, T. Fujita, H. You and G. Chen, *Ceram. Int.*, 2021, **47**, 12450-12458.
60. M. Zhou, R. Liang, Z. Zhou and X. Dong, *J. Mater. Chem. A*, 2018, **6**, 17896-17904.
61. J. Ye, G. Wang, M. Zhou, N. Liu, X. Chen, S. Li, F. Cao and X. Dong, *J. Mater. Chem. C*, 2019, **7**, 5639-5645.
62. J. Chen, H. Qi and R. Zuo, *ACS Appl. Mater. Interfaces*, 2020, **12**, 32871-32879.
63. A. Tian, R. Zuo, H. Qi and M. Shi, *J. Mater. Chem. A*, 2020, **8**, 8352-8359.
64. L. Yang, X. Kong, Z. Cheng and S. Zhang, *ACS Appl. Mater. Interfaces*, 2020,

- 12**, 32834-32841.
65. L. Yang, X. Kong, Z. Cheng and S. Zhang, *J. Mater. Res.*, 2020, **300**, 1-9.
  66. X. Dong, X. Li, X. Chen, H. Chen, C. Sun, J. Shi, F. Pang and H. Zhou, *J. Materiomics*, 2021, **7**, 629-639.
  67. X. Dong, X. Li, X. Chen, H. Chen, C. Sun, J. Shi, F. Pang and H. Zhou, *Ceram. Int.*, 2021, **47**, 3079-3088.
  68. C. Sun, X. Chen, J. Shi, F. Pang, X. Dong, H. y. Chen, K. Wang, X. Zhou and H. Zhou, *J. Eur. Ceram. Soc.*, 2021, **41**, 1891-1903.
  69. J. Liu, P. Li, C. Li, W. Bai, S. Wu, P. Zheng, J. Zhang and J. Zhai, *ACS Appl. Mater. Interfaces*, 2022, **14**, 17662-17673.
  70. B. Qu, H. Du, Z. Yang, Q. Liu and T. Liu, *RSC Adv.*, 2016, **6**, 34381-34389.
  71. B. Qu, H. Du, Z. Yang and Q. Liu, *J. Am. Ceram. Soc.*, 2017, **100**, 1517-1526.
  72. T. Shao, H. Du, H. Ma, S. Qu, J. Wang, J. Wang, X. Wei and Z. Xu, *J. Mater. Chem. A*, 2017, **5**, 554-563.
  73. X. Ren, L. Jin, Z. Peng, B. Chen, X. Qiao, D. Wu, G. Li, H. Du, Z. Yang and X. Chao, *Chem. Eng. J.*, 2020, **390**, 124566.
  74. M. Zhang, H. Yang, D. Li, L. Ma and Y. Lin, *J. Mater. Chem. C*, 2020, **8**, 8777-8785.
  75. Y. Zhang and R. Zuo, *J. Eur. Ceram. Soc.*, 2020, **40**, 5466-5474.
  76. M. Zhang, H. Yang, Y. Yu and Y. Lin, *Chem. Eng. J.*, 2021, **425**, 131465.
  77. A. Manan, A. Ullah, M. A. Khan, A. S. Ahmad, Y. Iqbal, I. Qazi, M. U. Rehman, A. Ullah and H. Liu, *Mater. Res. Bull.*, 2022, **145**, 111521.
  78. F. Li, R. Si, T. Li, C. Wang and J. Zhai, *Ceram. Int.*, 2020, **46**, 6995-6998.
  79. H. Qi, A. Xie and R. Zuo, *Energy Stor. Mater.*, 2022, **45**, 541-567.
  80. N. Liu, R. Liang, X. Zhao, C. Xu, Z. Zhou and X. Dong, *J. Am. Ceram. Soc.*, 2018, **101**, 3259-3265.
  81. H. Yang, H. Qi and R. Zuo, *J. Eur. Ceram. Soc.*, 2019, **39**, 2673-2679.
  82. H. Sun, X. Wang, Q. Sun, X. Zhang, Z. Ma, M. Guo, B. Sun, X. Zhu, Q. Liu and X. Lou, *J. Eur. Ceram. Soc.*, 2020, **40**, 2929-2935.

83. G. Wang, Z. Lu, H. Yang, H. Ji, A. Mostaed, L. Li, Y. Wei, A. Feteira, S. Sun, D. C. Sinclair, D. Wang and I. M. Reaney, *J. Mater. Chem. A*, 2020, **8**, 11414-11423.
84. N. Liu, R. Liang, Z. Zhou and X. Dong, *J. Mater. Chem. C*, 2018, **6**, 10211-10217.
85. J. Xing, Y. Huang, Q. Xu, B. Wu, Q. Zhang, Z. Tan, Q. Chen, J. Wu and J. Zhu, *ACS Appl. Mater. Interfaces*, 2021, **13**, 28472-28483.
86. X. Li, Y. Cheng, F. Wang, Q. Xu, Y. Chen, L. Xie, Z. Tan, J. Xing and J. Zhu, *Chem. Eng. J.*, 2022, **431**, 133441.
87. Q. Yuan, F.-Z. Yao, S.-D. Cheng, L. Wang, Y. Wang, S.-B. Mi, Q. Wang, X. Wang and H. Wang, *Adv. Funct. Mater.*, 2020, **30**, 2000191.
88. W. Yang, H. Zeng, F. Yan, J. Lin, G. Ge, Y. Cao, W. Du, K. Zhao, G. Li, H. Xie and J. Zhai, *J. Mater. Chem. A*, 2022, **10**, 11613-11624.
89. Z. Che, L. Ma, G. Luo, C. Xu, Z. Cen, Q. Feng, X. Chen, K. Ren and N. Luo, *Nano Energy*, 2022, **100**, 107484.
90. F. Yan, H. Bai, G. Ge, J. Lin, C. Shi, K. Zhu, B. Shen, J. Zhai and S. Zhang, *Small*, 2022, **18**, 2106515.
91. X. Dong, X. Li, X. Chen, Z. Tan, J. Wu, J. Zhu and H. Zhou, *Nano Energy*, 2022, **101**, 107577.
